# Supplementary material for: Surveillance and care for confirmed and suspected patients with COVID-19 in general practice (CovidCare): study protocol for an observational trial
Source: Springer Nature journal article supplement (doi:10.1186/s12875-021-01515-8), 2021-09-02
Supplement: MOESM1 [file 19624306]

**Process evaluation:**  
**Surveillance and care for confirmed and suspected patients with COVID-19**  
**in general practice (CovidCare)**  
**Interview guide for patients**  
(finalised version as of 31<sup>st</sup> January 2021)

*1. Reach*

- How would you describe your willingness to be treated in the CovidCare-module and participate in the CovidCare study?
- How were you made aware of the study?
- How many Assessments and Monitorings have been conducted?

*2. Adoption*

- What motivated you to use the CovidCare-module and participate in the CovidCare study?
- What was your first impression of the CovidCare-module?
  - Which expectations and concerns did you have?
  - What has (not) been fulfilled?
- What advantages and disadvantages do you anticipate in using the CovidCare-module?

*3. Efficacy*

- How satisfied were you with the treatment of the CovidCare-module?
  - e.g. duration of the Assessments/Monitorings
- Which aspects of the CovidCare-module have you used (e.g. symptom diary)?
  - Which aspects did you find (not) helpful and why?
- To what extent has the treatment within the CovidCare-module influenced you? Do you consider this as helpful, why?
  - To what extent has the treatment within the CovidCare-module influenced the relationship to your general practitioner?
- To what extent has the CovidCare-module contributed to your management of your Covid-19 disease?

#### *4. Implementation*

- How did the Assessment or Monitoring proceed?
  - Who conducted the Assessment/Monitoring/final consultation?
  - What were you advised to do?
  - Which of these aspects have you implemented?
- How were you cared for by your general practitioner before using the CovidCare-module?
- To what extent have you perceived problems regarding the treatment within the CovidCare-module?

#### *5. Maintenance*

- Would you recommend care via the CovidCare-module to others?
  - Why (not)?
- What would you suggest to facilitate the usage of the CovidCare-module?
- Which importance do you attribute to app-based applications?

#### *6. Interview termination*

- Are there any remaining aspects important to you that we have not addresses so far?
- Do you have any further questions?
