# Supplementary material for: Surveillance and care for confirmed and suspected patients with COVID-19 in general practice (CovidCare): study protocol for an observational trial
Source: Springer Nature journal article supplement (doi:10.1186/s12875-021-01515-8), 2021-09-02
Supplement: MOESM2 [file 19624306]

**Process evaluation:**  
**Surveillance and care for confirmed and suspected patients with COVID-19**  
**in general practice (CovidCare)**  
**Interview guide for general practitioners and VERAHs**  
(finalised version as of 31<sup>st</sup> January 2021)

*1. Reach*

- What motivated you to use the CovidCare-module and participate in the CovidCare study?
- Only for general practitioners: How did you decide whether or not a patient will be monitored within the CovidCare-module/will be invited to participate in the CovidCare study?
  - How were patients made aware of the study?
  - Were patients deliberately not made aware of the study?
- How would you describe the willingness of patients to be treated in the CovidCare-module and participate in the CovidCare study?
- How would you describe the patients who have been treated within the CovidCare-module?

*2. Efficacy*

- How satisfied were you with the use of the CovidCare-module?
- Which aspects of the CovidCare-module have you used?
- Which aspects did you find (not) helpful and why?
- To what extent has the use of the CovidCare-module influenced patient care? Do you consider this as helpful, why?
  - Which effects did you recognize for patients? Do you consider this as helpful, why?
- To what extent has the use of the CovidCare-module influences your work (positively and negatively)?

*3. Adoption*

- Why did you decide to implement the CovidCare-module?
  - Which expectations and concerns did you have?

- What has (not) been fulfilled?
- What advantages and disadvantages do you anticipate in using the CovidCare-module?
- Why did some general practitioners and/or VERAHs in your practice use the CovidCare-module and others not?

#### *4. Implementation*

- How do you use the CovidCare-module? Can you describe the process with an example of a patient?
  - Who conducted the assessment, monitoring etc.?
- To what extent have you made adjustments? (e.g. regarding the number of assessments, monitorings and the questions)
- How did you treat Covid-19-patients before using the CovidCare-module?

#### *5. Maintenance*

- Will you continue to use the CovidCare-module in your practice? Why (not)?
- How do you assess the chances of a widespread implementation of the CovidCare-module?
  - Which facilitators and barriers do you anticipate?
- What would you suggest to facilitate the usage of the CovidCare-module?
- Which importance do you attribute to app-based applications?

#### *6. Interview termination*

- Are there any remaining aspects important to you that we have not addresses so far?
- Do you have any further questions?
